# Supplementary material
Source: HighWire-hosted journal article supplement (https://bmjopengastro.bmj.com/content/9/1/e000985)

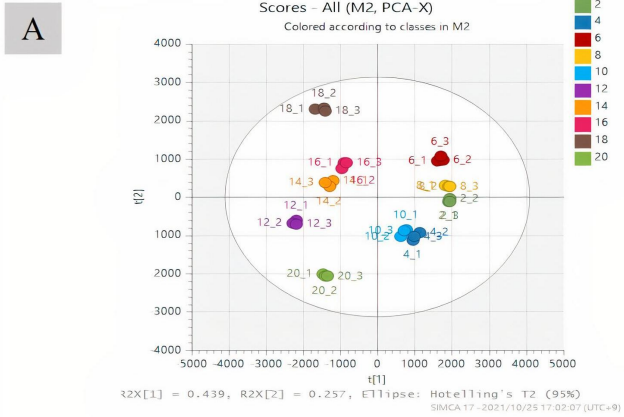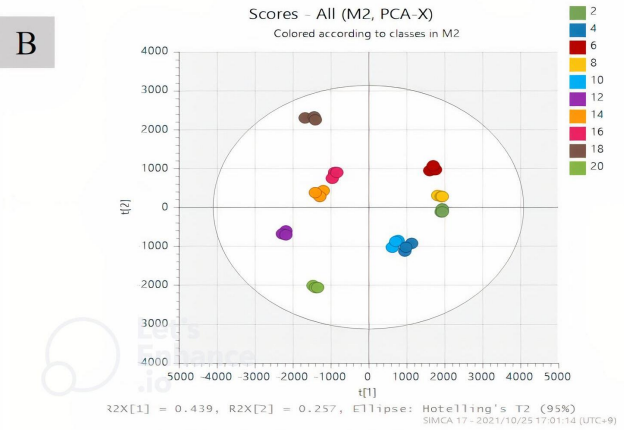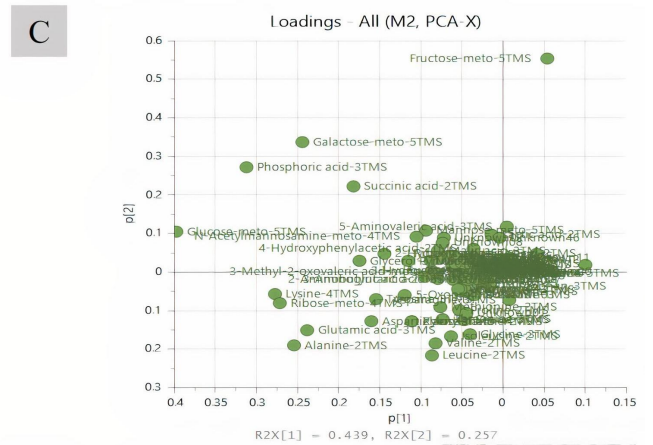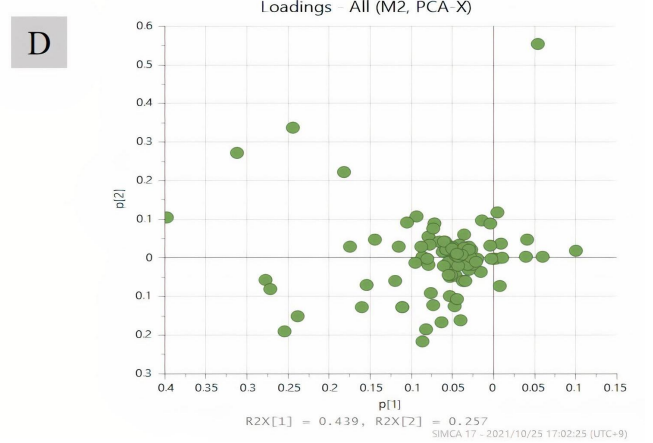

Supplement: inline-supplementary-material-5 [file inline-supplementary-material-5.pdf]

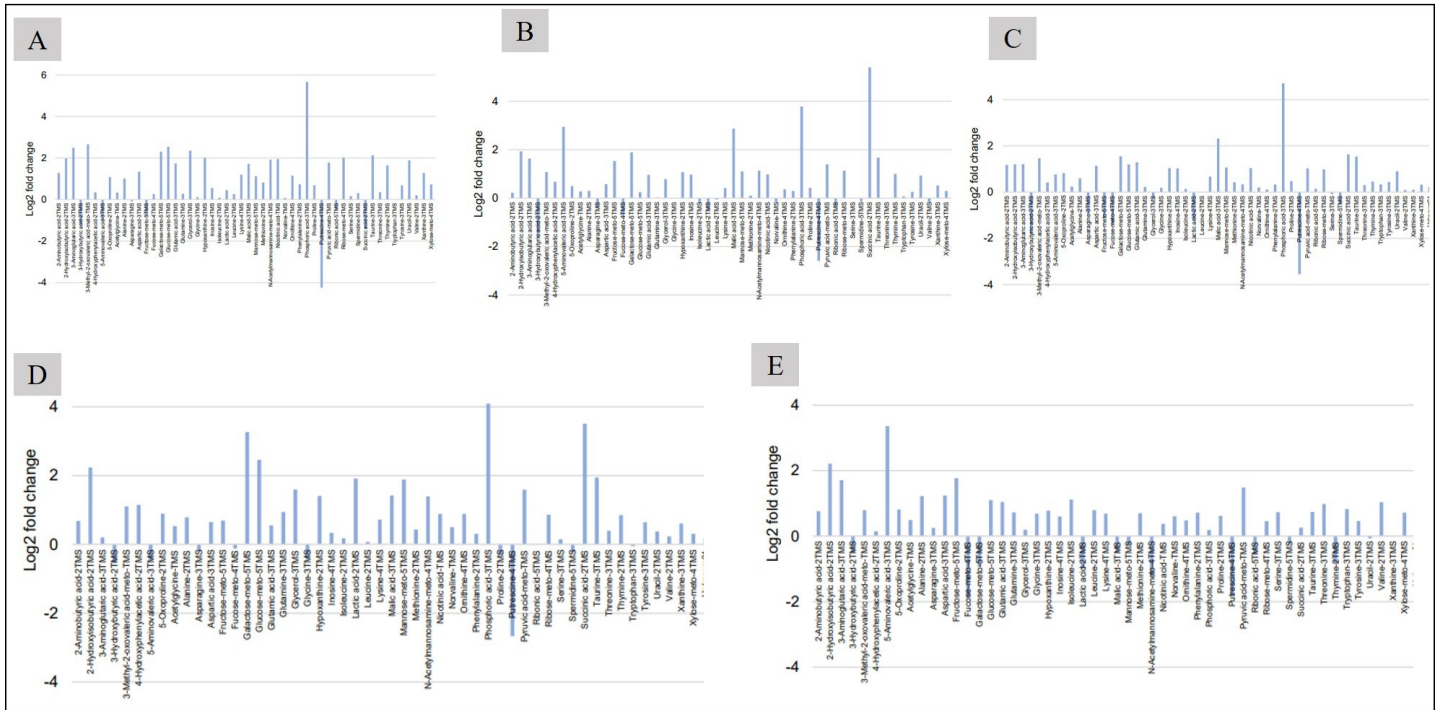

Supplement: inline-supplementary-material-6 [file inline-supplementary-material-6.pdf]

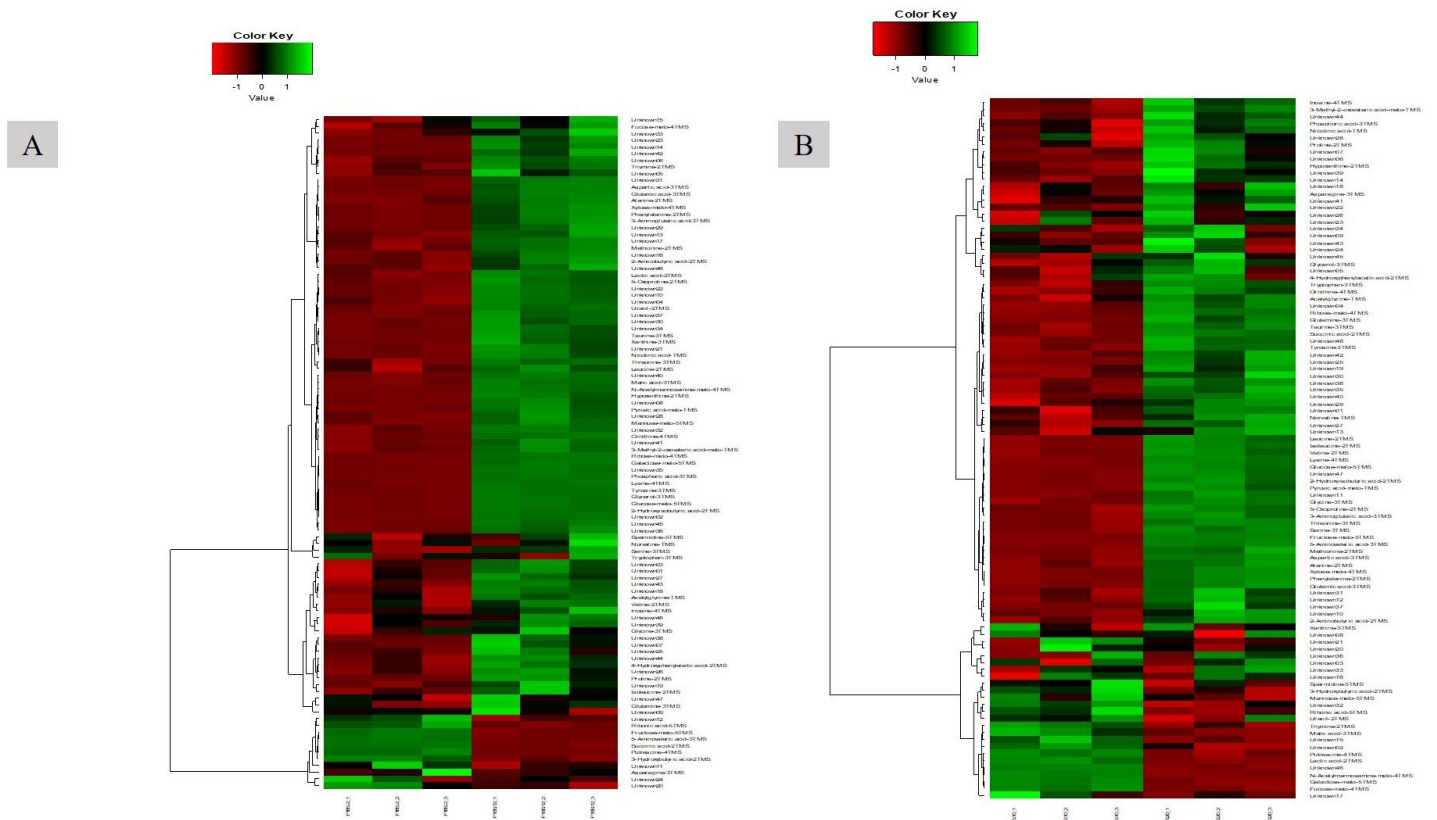

Supplement: inline-supplementary-material-7 [file inline-supplementary-material-7.pdf]
